# Supplementary material for: Evolutionary Game Analysis of Coal Enterprise Resource Integration Under Government Regulation
Source: Research Square preprint supplement (doi:10.21203/rs.3.rs-443543/v1), 2021-05-10
Supplement: Supplementary file 1 [file 093735ac91681f3b03bfc7fe.docx]

**Appendix A. Calculation details of model 1**

The payment matrix of Enterprise-A is defined as A, which is shown as follows：

(A1)

(A2)

(A3)

(A4)

The payment matrix of Enterprise-B is defined as B, which is shown as follows：

(A5)

(A6)

(A7)

(A8)

(A9)

(A10)

(A11)

(A12)

(A13)

(A14)

(A15)

**Table A1** The determinant and trace of the Jacobian matrix

| Equilibrium point | determinant expression | trace expression |
| --- | --- | --- |
|  |  |  |
|  |  |  |
|  |  |  |
|  |  |  |
|  |  |  |

**Appendix B. Calculation details of model 2**

The payment matrix of Enterprise-Z is defined as , which is shown as follows：

(B1)

(B2)

(B3) (B4)

The payment matrix of Government-W is defined as W, which is shown as follows：

(B5)

(B6)

(B7)

(B8)

(B9)

(B10)

(B11)

(B12)

(B13)

(B14)

(B15)

**Table B1** The determinant and trace of the Jacobian matrix

| Equilibrium point | determinant expression | trace expression |
| --- | --- | --- |
|  |  |  |
|  |  |  |
|  |  |  |
|  |  |  |
|  |  | 0 |
